# Does Conflict of Interest Disclosure Worsen Bias?

The *PLoS Medicine* Editors\*

On March 13, 2012 *PLoS Medicine* published an analysis by Lisa Cosgrove and Sheldon Krimsky [1] that examined the financial conflicts of interest of members of the American Psychiatric Association (APA) responsible for updating the Diagnostic and Statistical Manual of Mental Disorders (DSM), the so-called bible of psychiatry. Despite a new APA policy designed to address conflicts of interest (COIs), nearly 70% of current DSM-5 task force members have financial relationships with pharmaceutical companies, up from 57% for the manual's previous version. 83% of current contributors to the psychotic disorders section, and everyone responsible for the sleep disorder section, have links to the pharmaceutical industry. Wide media coverage and commentary about these findings [2–5] have raised concerns that so many of the experts charged with the responsibility of defining mental health conditions and treatments have financial ties to the very companies that sell drug treatments for mental health. It is widely established that financial conflicts of interest impair objectivity and integrity in medicine.

Concerns about the conflicts of interests associated with the APA—undeniably the leading authority for psychiatry and mental health—are critical, not least because of the association's legacy of involvement with the pharmaceutical industry: the psychiatric profession receives more money than any other medical specialty [6] and has recently been scandalized by cases of ghostwriting and publication bias. Their judgments define mental illness, thus legitimizing some disorders and denying others, and determine what warrants treatment and how. The DSM is used by insurance companies, hospitals, courts, prisons, schools, researchers, regulators, and government agencies to define who is sick/abnormal and who is not. The expansion of diagnostic categories and new diagnoses (and thus markets) in every DSM is said to be a virtual “bonanza for the pharmaceutical industry” [9]. And on the other side of the coin, the DSM is a boon for the APA, which sold over a million copies of the DSM-IV; 20% of APA funding is said to now come from pharmaceutical companies [8].

Cosgrove and Krimsky also identified several worrying gaps in the APA's new COI policy (previous DSMs in 1952, 1968, and 1980 were not subject to COI policies). While the policy limits the amount panel members can receive from drug companies annually to US\$10,000 and of their company stock holdings to US\$50,000, these are still considerable amounts. (Even small gifts invoke obligations to reciprocate [6]). Worse, the policy does not consider unrestricted research grants from pharmaceutical companies to be problematic and does not require they be disclosed. Participation in lucrative speakers' bureaus (networks of prominent physicians designed to influence communities of prescribers and usually forbidden in medical schools) is likewise permitted under the APA's policy, and the monies received for participation are required only to be reported as honoraria, thus concealing their true genesis. The APA has responded to the *PLoS Medicine* analysis by saying that the DSM-5 development process “is the most open and transparent of any previous edition of the DSM” [2].

But are disclosure mandates simply a band-aid on a unrelenting problem of bias?

Disclosure is generally considered preferable to nondisclosure, because it makes explicit and transparent details that are important to the interpretation, credibility, and value of the information presented—vital in the context of clinical decision-making and patient care. But the overemphasis and reliance on disclosure policies is

exactly what leaves the real problem of the conflict of interest unaddressed.

Disclosure has severe limits as a strategy for mitigating bias. Cosgrove and Krimsky mention three reasons: that disclosure alone merely shifts “secret bias” to “open bias”; that it sometimes involves so much information about ties to the industry, for example, that the reader is blinded by the sheer “signal to noise ratio”; and that disclosure may be perceived as absolving a person from their responsibility for managing their conflict [1].

Even more compelling is evidence emerging from the social sciences that suggests disclosure to be not only ineffective but also regressive. Decision scientist George Loewenstein and colleagues have argued that disclosure can actually lead doctors to give biased advice, either through strategic exaggeration (whereby more biased advice is provided to counteract anticipated discounting), or “moral licensing” such that advice is legitimized because advisees “have been warned” (that is, caveat emptor or “buyer beware”) [7]. Their experiments have essentially shown that bias is considerably greater when conflicts of interest are disclosed. Worse, because Loewenstein and colleagues have demonstrated that advisees (i.e., patients) both think that their advisers (i.e., doctors) would never intentionally mislead them and tend not to discount advice in light of conflicts, disclosure policies will never be the solution and are very likely exacerbating the problem of bias in medicine [7].

Extending this analysis to the APA's DSM, the result would be disastrous if the

**Citation:** The *PLoS Medicine* Editors (2012) Does Conflict of Interest Disclosure Worsen Bias? *PLoS Med* 9(4): e1001210. doi:10.1371/journal.pmed.1001210

**Published:** April 24, 2012

**Copyright:** © 2012 *PLoS Medicine* Editors. This is an open-access article distributed under the terms of the Creative Commons Attribution License, which permits unrestricted use, distribution, and reproduction in any medium, provided the original author and source are credited.

**Funding:** The authors are each paid a salary by the Public Library of Science, and they wrote this editorial during their salaried time.

**Competing Interests:** The authors' individual competing interests are at <http://www.plosmedicine.org/static/editorsInterests.action>. PLoS is funded partly through manuscript publication charges, but the *PLoS Medicine* Editors are paid a fixed salary (their salary is not linked to the number of papers published in the journal).

**Abbreviations:** APA, American Psychiatric Association; COI, conflict of interest; DSM, Diagnostic and Statistical Manual of Mental Disorders.

\* E-mail: [medicine\\_editors@plos.org](mailto:medicine_editors@plos.org)

The *PLoS Medicine* Editors are Virginia Barbour, Jocalyn Clark, Melissa Norton, Paul Simpson, and Emma Veitch.

**Provenance:** Written by editorial staff; not externally peer reviewed.

public or physicians were to disregard their concerns about financial conflicts of interest in deference to the authority of the APA. And if clinical experts were to believe that disclosure alone made them impervious to bias, their advice forming the DSM may be even more favorable toward the pharmaceutical products and markets their industry funders seek and uphold.

Indeed, if disclosure worsens bias, then this is a game-changer for discussion and debate about managing conflicts of interest in medicine. Journals, professional associations, clinical guideline developers, and others need to worry not just that disclosure provides a band-aid to the real problem of the COI itself, but that any attempt to stem the trouble through

disclosure policies may actually be worsening the problem.

## Author Contributions

Wrote the first draft of the manuscript: JC. Contributed to the writing of the manuscript: VB JC MN PS EV.

## References

1. Cosgrove L, Krinsky S (2012) A Comparison of *DSM-IV* and *DSM-5* Panel Members' Financial Associations with Industry: A Pernicious Problem Persists. *PLoS Med* 9: e1001190. doi:10.1371/journal.pmed.1001190.
2. [No author listed] (16 March 2012) *DSM-5 Criticized for Financial Conflicts of Interest*. ABC News, Available: <http://www.12newsnow.com/story/17154951/dsm-5-criticized-for-financial-conflicts-of-interest>. Accessed 27 March 2012.
3. Ledford H (16 March 2012) Industry ties remain rife on panels for psychiatry manual. *Nature News*, Available: <http://www.nature.com/news/industry-ties-remain-rife-on-panels-for-psychiatry-manual-1.10206>. Accessed 27 March 2012.
4. Aldhous P (13 March 2012) Many authors of psychiatry bible have industry ties. *New Scientist*, <http://www.newscientist.com/article/dn21580-many-authors-of-psychiatry-bible-have-industry-ties.html>. Accessed 27 March 2012.
5. Yeung Y (16 March 2012) Study finds ties to drugmakers on mental health panel. *UT San Diego News*, Available: <http://www.utsandiego.com/news/2012/mar/16/study-finds-ties-to-drugmakers-on-mental-health-panel/>. Accessed 27 March 2012.
6. Angell M (14 July 2011) *The Illusions of Psychiatry*. *The New York Review of Books*, Available: <http://www.nybooks.com/articles/archives/2011/jul/14/illusions-of-psychiatry/?pagination=false>. Accessed 27 March 2012.
7. Katz D, Caplan AL, Merz JF (2003) All gifts large and small: Toward an understanding of the ethics of pharmaceutical industry gift-giving. *Am J Bioeth* 3: 39–46.
8. Loewenstein G, Sah S, Cain DM (2012) The unintended consequences of conflict of interest disclosure. *JAMA* 307: 669–670.
9. Frances A (26 June 2009) A Warning Sign on the Road to *DSM-V*: Beware of Its Unintended Consequences. *Psychiatric Times*, Available: <http://www.psychiatrictimes.com/print/article/10168/1425378>. Accessed 27 March 2012.
